# Supplementary material
Source: PubMed Central journal article supplement (PMC3837768)
Supplement: AEM.01970-13_zam999104916so1.pdf [file AEM.01970-13_zam999104916so1.pdf]

**Supplementary material for:** Stark contrast in denitrification and anammox across the deep Norwegian Trench: The Skagerrak. Mark Trimmer, Pia Engström and Bo Thamdrup.

**Supplementary Table 1.** Nutrient concentrations in the overlying water of the reference cores for the r-IPT assay prior to spiking with  $^{15}\text{NO}_3^-$  (mean  $\pm$  s.e.,  $n=20$ ) for the four sites. In addition, the maximum penetration depth for oxygen into the sediment ( $n = 6$ ) is also given ( $\text{O}_2$  pen), which was used to estimate the pre-incubation time required for the spike of  $^{15}\text{NO}_3^-$  to reach the anoxic strata (see below).

| Site | $\text{NH}_4^+$<br>( $\mu\text{M}$ ) | $\text{NO}_3^-$<br>( $\mu\text{M}$ ) | $\text{NO}_2^-$<br>( $\mu\text{M}$ ) | $\text{HPO}_4^{2-}$<br>( $\mu\text{M}$ ) | $\text{O}_2$ pen<br>(cm) | Pre-incubation<br>time (h)* |
|------|--------------------------------------|--------------------------------------|--------------------------------------|------------------------------------------|--------------------------|-----------------------------|
| S4   | 2.3 $\pm$ 0.22                       | 8.6 $\pm$ 0.17                       | 0.30 $\pm$ 0.012                     | 0.75 $\pm$ 0.02                          | 0.7 $\pm$ 0.04           | 3.5                         |
| S6   | 1.4 $\pm$ 0.27                       | 9.3 $\pm$ 0.22                       | 0.12 $\pm$ 0.005                     | 0.80 $\pm$ 0.02                          | 1.1 $\pm$ 0.07           | 8.7                         |
| S8   | 0.92 $\pm$ 0.3                       | 7.6 $\pm$ 0.49                       | 0.052 $\pm$ 0.006                    | 0.71 $\pm$ 0.03                          | 2.4 $\pm$ 0.09           | 41.8                        |
| S9   | 0.67 $\pm$ 0.1                       | 4.8 $\pm$ 0.49                       | 0.035 $\pm$ 0.006                    | 0.59 $\pm$ 0.03                          | 1.5 $\pm$ 0.07           | 16.1                        |

\*Note: the estimate of the time taken for  $^{15}\text{NO}_3^-$  to diffuse to the anoxic sediment layers ( $\text{O}_2$  pen) was based on a field estimate for porosity of 0.9 according to:

$$\text{Time}(s) = \frac{L^2}{D_{\text{sed}} \times 4}$$

$$D_{\text{sed}} = D_s \times \frac{\phi}{F}$$

$$F = \frac{1}{\phi^{1.3}}$$

Where  $L$  is the measured  $\text{O}_2$  pen;  $D_s$  is the diffusivity for  $\text{NO}_3^-$  ( $1.2337 \times 10^{-5} \text{ cm}^2 \text{ s}^{-1}$  in seawater at  $7^\circ$ ) from (1);  $\phi$  is the estimate of sediment porosity;  $F$  is sediment resistivity.

**Supplementary Table 2.** Results of a 2-way ANOVA with pair-wise comparisons\* across all four sites for the ratio of  $^{14}\text{N}$  to  $^{15}\text{N}$  ( $r_{14}$ ) in the  $\text{N}_2$  and  $\text{N}_2\text{O}$  produced in the r-IPT sediment core incubations.

| <b>Site</b> | <b><math>r_{14}\text{N}_2</math></b> | <b><math>r_{14}\text{N}_2\text{O}</math></b> | <b>Mean difference <math>\pm</math> s.e.</b> | <b><i>P</i></b> |
|-------------|--------------------------------------|----------------------------------------------|----------------------------------------------|-----------------|
| S4          | 1.129                                | 1.014                                        | $0.115 \pm 0.535$                            | 0.830           |
| S6          | 1.636                                | 2.210                                        | $-0.574 \pm 0.479$                           | 0.233           |
| S8          | 4.635                                | 0.448                                        | $4.186 \pm 0.594$                            | <0.001          |
| S9          | 3.575                                | 0.447                                        | $3.128 \pm 0.618$                            | <0.001          |

\*Significant interaction between  $\text{N}_2$  and  $\text{N}_2\text{O}$  and site on  $r_{14}$  ( $P < 0.000$ )

**Supplementary Table 3.** Anammox and total bacteria abundance in DNA extracted from sediment at the four sites. Anammox bacteria abundance is presented with the mean value from three replicate wells in the q-PCR run  $\pm$  s.e. Ct values show the number of PCR cycles that were required to reach the fluorescence intensity threshold set for the analysis (see material and methods). Ct values  $>39$  means undetectable, standard error for the Ct values never exceeded 0.7. Total bacteria abundance was estimated using a Nanodrop spectrometer to measure the amount of DNA extracted from the sediment. b.d. = below detection.

| Site      | Depth    | Anammox bacteria<br>16S rRNA copies g <sup>-1</sup> wet<br>sediment | Total bacteria<br>cells g <sup>-1</sup> wet<br>sediment | Ct value | Mean value<br>Anammox abundance<br>for whole depth interval |
|-----------|----------|---------------------------------------------------------------------|---------------------------------------------------------|----------|-------------------------------------------------------------|
| <b>S4</b> | 0-0.5 cm | $2.6 \times 10^6 \pm 3.3 \times 10^5$                               | $7.8 \times 10^8$                                       | 32       | $3.2 \times 10^5 \pm 1.9 \times 10^5$                       |
|           | 0.5-1 cm | b.d.                                                                | $5.6 \times 10^8$                                       | 39       |                                                             |
|           | 1-1.5 cm | b.d.                                                                | $9.2 \times 10^8$                                       | $>39$    |                                                             |
|           | 1.5-2 cm | b.d.                                                                | $6.9 \times 10^8$                                       | $>39$    |                                                             |
|           | 2-2.5 cm | b.d.                                                                | $1.6 \times 10^9$                                       | $>39$    |                                                             |
|           | 2.5-3 cm | b.d.                                                                | $1.2 \times 10^9$                                       | $>39$    |                                                             |
|           | 3-4 cm   | b.d.                                                                | $7.9 \times 10^8$                                       | $>39$    |                                                             |
|           | 4-5 cm   | b.d.                                                                | $5.7 \times 10^8$                                       | $>39$    |                                                             |
| <b>S6</b> | 0-0.5 cm | $4.2 \times 10^4 \pm 6.2 \times 10^3$                               | $8.2 \times 10^8$                                       | 38       | $2.9 \times 10^5 \pm 1.1 \times 10^5$                       |
|           | 0.5-1 cm | b.d.                                                                | $1.2 \times 10^9$                                       | $>39$    |                                                             |
|           | 1-1.5 cm | b.d.                                                                | $7.6 \times 10^8$                                       | $>39$    |                                                             |
|           | 1.5-2 cm | $3.3 \times 10^5 \pm 1.4 \times 10^5$                               | $1.4 \times 10^9$                                       | 37       |                                                             |
|           | 2-2.5 cm | $3.7 \times 10^5 \pm 1.4 \times 10^5$                               | $1.3 \times 10^9$                                       | 36       |                                                             |
|           | 2.5-3 cm | $1.1 \times 10^6 \pm 3.0 \times 10^5$                               | $1.6 \times 10^9$                                       | 34       |                                                             |
| <b>S8</b> | 0-0.5 cm | $5.8 \times 10^6 \pm 5.7 \times 10^5$                               | $1.5 \times 10^9$                                       | 31       | $7.4 \times 10^6 \pm 1.5 \times 10^6$                       |
|           | 0.5-1 cm | $3.3 \times 10^6 \pm 3.9 \times 10^4$                               | $1.4 \times 10^9$                                       | 32       |                                                             |
|           | 1-1.5 cm | $4.1 \times 10^6 \pm 2.9 \times 10^5$                               | $1.4 \times 10^9$                                       | 31       |                                                             |
|           | 1.5-2 cm | $3.6 \times 10^6 \pm 1.7 \times 10^5$                               | $1.4 \times 10^9$                                       | 32       |                                                             |
|           | 2-2.5 cm | $1.1 \times 10^7 \pm 1.5 \times 10^6$                               | $1.4 \times 10^9$                                       | 30       |                                                             |
|           | 2.5-3 cm | $5.6 \times 10^6 \pm 1.3 \times 10^6$                               | $1.4 \times 10^9$                                       | 31       |                                                             |
|           | 3-4 cm   | $2.2 \times 10^7 \pm 4.0 \times 10^6$                               | $9.9 \times 10^8$                                       | 28       |                                                             |
| <b>S9</b> | 0-0.5 cm | $2.7 \times 10^6 \pm 4.6 \times 10^5$                               | $1.5 \times 10^9$                                       | 32       | $1.0 \times 10^7 \pm 2.1 \times 10^6$                       |
|           | 0.5-1 cm | $1.2 \times 10^6 \pm 3.7 \times 10^5$                               | $1.4 \times 10^9$                                       | 33       |                                                             |
|           | 1-1.5 cm | $1.0 \times 10^6 \pm 5.9 \times 10^4$                               | $1.7 \times 10^9$                                       | 32       |                                                             |
|           | 1.5-2 cm | $2.9 \times 10^6 \pm 7.6 \times 10^4$                               | $1.4 \times 10^9$                                       | 30       |                                                             |
|           | 2-2.5 cm | $7.4 \times 10^6 \pm 9.9 \times 10^5$                               | $1.3 \times 10^9$                                       | 28       |                                                             |
|           | 2.5-3 cm | $3.0 \times 10^7 \pm 3.4 \times 10^6$                               | $1.3 \times 10^9$                                       | 27       |                                                             |
|           | 3-3.5 cm | $2.5 \times 10^7 \pm 5.3 \times 10^6$                               | $1.3 \times 10^9$                                       | 28       |                                                             |
|           | 4-4.5 cm | $2.0 \times 10^7 \pm 1.2 \times 10^6$                               | $1.1 \times 10^9$                                       | 28       |                                                             |
|           | 4.5-5 cm | $9.6 \times 10^6 \pm 2.1 \times 10^6$                               | $1.1 \times 10^9$                                       | 29       |                                                             |

1. **Li Y-H, Gregory S.** 1974. Diffusion of ions in seawater and in deep-sea sediments. *Geochimica et Cosmochimica Acta* **38**:703-714.
